# Supplementary material for: A Neuromedin U Receptor Acts with the Sensory System to Modulate Food Type-Dependent Effects on C. elegans Lifespan
Source: PLoS Biol. 2010 May 25;8(5):e1000376. doi: 10.1371/journal.pbio.1000376 (PMC2876044; doi:10.1371/journal.pbio.1000376)
Supplement: Table S3 — Individual trials of adult lifespans on different food sources at 25°C. The analyses performed here are as described in the legend of Table 1. The superscripted symbols indicate the following: a, compared to the same genotype assayed in parallel on OP50 in independent trials; b, compared to jxEx4[myo-3p::rfp] on the same food source in independent trials; c, compared to the rescue line on the same food source in independent trials; and d, compared to the same genotype assayed in parallel on CS180 in independent trials. (0.27 MB DOC) [file pbio.1000376.s008.doc]

*Supplementary Table 3. Individual trials of adult lifespans on different food sources at 25oC*

| Strain/Treatment | Mean Lifespan  SEM (Days) | 75th Percentile (Days) | No. of Animals Observed/  Total Initial Animals | %  Wild type | *P* Value Against Wild type  (Logrank) | *P* Value Against Wild type  (Wilcoxon) | % of Specified Groups | *P* Value Against Specified Groups  (Logrank) | *P* Value Against Specified Groups  (Wilcoxon) |
| --- | --- | --- | --- | --- | --- | --- | --- | --- | --- |
| Sensory mutants |  |  |  |  |  |  |  |  |  |
| Trial 1 - OP50: Wild type | 11.7  0.5 | 15 | 71/80 |  |  |  |  |  |  |
| Trial 1 - OP50: *daf-10(m79)* | 15.8  1.3 | 27 | 39/78 | *+ 35* | 0.004 | 0.15 |  |  |  |
| Trial 1 - HT115: Wild type | 12.2  0.4 | 15 | 68/70 |  |  |  | + 4 | 0.79a | 0.17a |
| Trial 1 - HT115: *daf-10(m79)* | 17.3  1.1 | 24 | 56/70 | **+ 42** | < 0.0001 | 0.004 | + 9 | 0.29a | 0.15a |
| Trial 2 - OP50: Wild type | 10.9  0.5 | 15 | 59/70 |  |  |  |  |  |  |
| Trial 2 - OP50: *daf-10(m79)* | 17.6 1.2 | 24 | 39/70 | **+ 61** | < 0.0001 | < 0.0001 |  |  |  |
| Trial 2 - HT115: Wild type | 11.9  0.4 | 15 | 56/70 |  |  |  | + 9 | 0.58a | 0.05a |
| Trial 2 - HT115: *daf-10(m79)* | 18.2  1.1 | 24 | 45/70 | **+ 53** | < 0.0001 | 0.0002 | + 3 | 0.75a | 0.62a |
|  |  |  |  |  |  |  |  |  |  |
| Trial 1 - OP50: Wild type | 10.9  0.5 | 15 | 59/70 |  |  |  |  |  |  |
| Trial 1 - OP50: *osm-3(n1540)* | 13.7  0.6 | 17 | 52/70 | **+ 26** | 0.0002 | 0.0005 |  |  |  |
| Trial 1 - HT115: Wild type | 11.9  0.4 | 15 | 56/70 |  |  |  | + 9 | 0.58a | 0.05a |
| Trial 1 - HT115: *osm-3(n1540)* | 11.4  0.6 | 15 | 55/70 | - 4 | 0.49 | 0.25 | **- 17** | 0.08a | 0.01a |
| Trial 2 - OP50: Wild type | 9.2  0.5 | 12 | 61/70 |  |  |  |  |  |  |
| Trial 2 - OP50: *osm-3(n1540)* | 12.5  0.4 | 15 | 78/100 | **+ 36** | < 0.0001 | < 0.0001 |  |  |  |
| Trial 2 - HT115: Wild type | 12.3  0.4 | 15 | 66/70 |  |  |  | **+ 34** | 0.0003a | < 0.0001a |
| Trial 2 - HT115: *osm-3(n1540)* | 13.2  0.4 | 16 | 90/100 | + 7 | 0.03 | 0.09 | + 6 | 0.11a | 0.16a |
| Trial 3 - OP50: Wild type | 11.3  0.5 | 15 | 67/80 |  |  |  |  |  |  |
| Trial 3 - OP50: *osm-3(n1540)* | 12.8  0.6 | 16 | 62/80 | *+ 13* | 0.01 | 0.06 |  |  |  |
| Trial 3 - HT115: Wild type | 11.3  0.4 | 15 | 76/80 |  |  |  | 0 | 0.50a | 0.91a |
| Trial 3 - HT115: *osm-3(n1540)* | 12.7  0.5 | 16 | 74/80 | *+ 12* | 0.004 | 0.02 | - 1 | 0.42a | 0.95a |
|  |  |  |  |  |  |  |  |  |  |
| *nmur-1* food-dependence |  |  |  |  |  |  |  |  |  |
| Trial 1 - OP50: Wild type | 10.5  0.5 | 14 | 73/80 |  |  |  |  |  |  |
| Trial 1 - OP50: *nmur-1* | 15.7  0.5 | 18 | 65/80 | **+ 50** | < 0.0001 | < 0.0001 |  |  |  |
|  |  |  |  |  |  |  |  |  |  |
| Suppl. Table 3 (Continued) |  |  |  |  |  |  |  |  |  |
| Strain/Treatment | Mean Lifespan  SEM (Days) | 75th Percentile (Days) | No. of Animals Observed/  Total Initial Animals | %  Wild type | *P* Value Against Wild type (Logrank) | *P* Value Against Wild type  (Wilcoxon) | % of Specified Groups | *P* Value Against Specified Groups  (Logrank) | *P* Value Against Specified Groups  (Wilcoxon) |
| Trial 1 - BL21: Wild type | 7.4  0.6 | 7 | 20/80 |  |  |  | **- 30** | 0.001a | 0.003a |
| Trial 1 - BL21: *nmur-1* | 9.9  0.6 | 13 | 44/80 | **+ 34** | 0.007 | 0.004 | **- 37** | < 0.0001 a | < 0.0001a |
| Trial 1 - HB101: Wild type | 13.2  0.5 | 16 | 74/80 |  |  |  | **+ 26** | 0.008a | < 0.0001a |
| Trial 1 - HB101: *nmur-1* | 16.4  0.5 | 19 | 70/80 | **+ 24** | < 0.0001 | < 0.0001 | + 4 | 0.17a | 0.37a |
| Trial 1 - HT115: Wild type | 12.4  0.4 | 15 | 70/80 |  |  |  | **+ 18** | 0.12a | 0.0007a |
| Trial 1 - HT115: *nmur-1* | 13.9  0.5 | 17 | 66/80 | + 12 | 0.04 | 0.02 | **- 11** | 0.001a | 0.002a |
| Trial 1 - DY330: Wild type | 11.9  0.4 | 14 | 73/80 |  |  |  | **+ 13** | 0.28a | 0.001a |
| Trial 1 - DY330: *nmur-1* | 13.0  0.4 | 15 | 72/80 | + 9 | 0.05 | 0.08 | **- 17** | < 0.0001a | < 0.0001a |
| Trial 1 - DH5: Wild type | 12.2  0.4 | 15 | 69/80 |  |  |  | **+ 16** | 0.26a | 0.001a |
| Trial 1 - DH5: *nmur-1* | 13.6  0.4 | 16 | 74/80 | + 11 | 0.04 | 0.02 | **- 13** | < 0.0001a | < 0.0001a |
|  |  |  |  |  |  |  |  |  |  |
| Trial 2 - OP50: Wild type | 10.1 0.6 | 14 | 48/70 |  |  |  |  |  |  |
| Trial 2 - OP50: *nmur-1* | 13.8 0.5 | 16 | 52/72 | **+ 37** | < 0.0001 | < 0.0001 |  |  |  |
| Trial 2 - BL21: Wild type | 8.1  0.4 | 10 | 32/70 |  |  |  | *- 20* | 0.001a | 0.05a |
| Trial 2 - BL21: *nmur-1* | 10.4  0.7 | 15 | 41/70 | *+ 28* | 0.008 | 0.09 | **- 25** | 0.002a | 0.0002a |
| Trial 2 - HB101: Wild type | 11.5  0.4 | 14 | 57/70 |  |  |  | + 14 | 0.48a | 0.10a |
| Trial 2 - HB101: *nmur-1* | 13.9 0.3 | 15 | 55/70 | **+ 21** | < 0.0001 | < 0.0001 | + 1 | 0.25a | 0.62a |
| Trial 2 - HT115: Wild type | 11.9 0.3 | 14 | 57/70 |  |  |  | + 18 | 0.51a | 0.02a |
| Trial 2 - HT115: *nmur-1* | 12.6 0.4 | 15 | 50/70 | *+ 6* | 0.003 | 0.08 | - 9 | 0.03a | 0.05a |
| Trial 2 - DY330: Wild type | 12.4  0.4 | 14 | 64/70 |  |  |  | **+ 23** | 0.02a | 0.005a |
| Trial 2 - DY330: *nmur-1* | 12.5  0.4 | 15 | 54/70 | + 1 | 0.72 | 0.64 | *- 9* | 0.01a | 0.03a |
| Trial 2 - DH5: Wild type | 10.3  0.2 | 12 | 62/70 |  |  |  | + 2 | 0.07a | 0.72a |
| Trial 2 - DH5: *nmur-1* | 13.1  0.4 | 15 | 62/70 | **+ 27** | < 0.0001 | < 0.0001 | - 5 | 0.13a | 0.11a |
|  |  |  |  |  |  |  |  |  |  |
| Trial 3 - OP50: Wild type | 10.9  0.6 | 16 | 57/70 |  |  |  |  |  |  |
| Trial 3 - OP50: *nmur-1* | 15.2  0.5 | 18 | 52/70 | **+ 39** | < 0.0001 | < 0.0001 |  |  |  |
|  |  |  |  |  |  |  |  |  |  |
| Suppl. Table 3 (Continued) |  |  |  |  |  |  |  |  |  |
| Strain/Treatment | Mean Lifespan  SEM (Days) | 75th Percentile (Days) | No. of Animals Observed/  Total Initial Animals | %  Wild type | *P* Value Against Wild type (Logrank) | *P* Value Against Wild type  (Wilcoxon) | % of Specified Groups | *P* Value Against Specified Groups  (Logrank) | *P* Value Against Specified Groups  (Wilcoxon) |
| Trial 3 - HB101: Wild type | 11.9 0.5 | 16 | 62/70 |  |  |  | + 9 | 0.74a | 0.19a |
| Trial 3 - HB101: *nmur-1* | 14.7  0.3 | 16 | 48/70 | **+ 24** | < 0.0001 | < 0.0001 | - 3 | 0.06a | 0.07a |
| Trial 3 - DH5: Wild type | 10.4 0.4 | 12 | 65/70 |  |  |  | - 5 | 0.12a | 1.0a |
| Trial 3 - DH5: *nmur-1* | 12.8 0.3 | 16 | 61/70 | **+ 23** | < 0.0001 | < 0.0001 | **- 16** | < 0.0001a | < 0.0001a |
|  |  |  |  |  |  |  |  |  |  |
| Trial 4 - OP50: Wild type | 11.3  0.7 | 17 | 62/70 |  |  |  |  |  |  |
| Trial 4 - OP50: *nmur-1* | 15.1  0.6 | 19 | 61/70 | **+ 34** | 0.002 | 0.0003 |  |  |  |
| Trial 4 - HT115: Wild type | 13.8  0.5 | 17 | 59/70 |  |  |  | **+ 22** | 0.17 a | 0.004a |
| Trial 4 - HT115: *nmur-1* | 13.0  0.6 | 15 | 50/60 | - 6 | 0.51 | 0.32 | **- 14** | 0.004a | 0.01a |
|  |  |  |  |  |  |  |  |  |  |
| Rescue experiments |  |  |  |  |  |  |  |  |  |
| Line 2 |  |  |  |  |  |  |  |  |  |
| Trial 1 |  |  |  |  |  |  |  |  |  |
| OP50: *jxEx4* | 12.5  0.6 | 16 | 45/52 |  |  |  |  |  |  |
| OP50: *nmur-1; jxEx40* | 14.1  0.7 | 18 | 44/72 | *+ 13* | 0.01b | 0.11b |  |  |  |
| OP50: *nmur-1; jxEx4* | 17.4  0.6 | 21 | 55/70 | **+ 39** | < 0.0001b | < 0.0001b | **+ 23** | 0.0007c | 0.001c |
| Trial 2 |  |  |  |  |  |  |  |  |  |
| OP50: *jxEx4* | 13.1  0.6 | 17 | 64/75 |  |  |  |  |  |  |
| OP50: *nmur-1; jxEx40* | 14.9  0.7 | 19 | 45/80 | + 14 | 0.03b | 0.02b |  |  |  |
| OP50: *nmur-1; jxEx4* | 17.4  0.6 | 21 | 65/74 | **+ 33** | < 0.0001b | < 0.0001b | **+ 17** | 0.006c | 0.006c |
| HT115: *jxEx4* | 11.3  0.4 | 13 | 58/72 |  |  |  |  |  |  |
| HT115: *nmur-1; jxEx40* | 13.2  0.5 | 17 | 80/89 | **+ 17** | 0.001b | 0.005b |  |  |  |
| HT115: *nmur-1; jxEx4* | 13.3  0.3 | 15 | 77/82 | **+ 18** | 0.0003b | 0.0001b | + 1 | 0.31c | 0.84c |
| Trial 3 |  |  |  |  |  |  |  |  |  |
| HT115: *jxEx4* | 11.1  0.4 | 14 | 70/80 |  |  |  |  |  |  |
| HT115: *nmur-1; jxEx40* | 13.5  0.5 | 16 | 66/80 | **+ 22** | < 0.0001b | < 0.0001b |  |  |  |
| HT115: *nmur-1; jxEx4* | 12.3  0.3 | 14 | 69/80 | + 11 | 0.05b | 0.02b | **- 9** | 0.001c | 0.01c |
| Suppl. Table 3 (Continued) |  |  |  |  |  |  |  |  |  |
| Strain/Treatment | Mean Lifespan  SEM (Days) | 75th Percentile (Days) | No. of Animals Observed/  Total Initial Animals | %  Wild type | *P* Value Against Wild type (Logrank) | *P* Value Against Wild type  (Wilcoxon) | % of Specified Groups | *P* Value Against Specified Groups  (Logrank) | *P* Value Against Specified Groups  (Wilcoxon) |
| *E. coli* LPS-dependence |  |  |  |  |  |  |  |  |  |
| Trial 1 - CS180: Wild type | 13.8  0.4 | 16 | 71/80 |  |  |  |  |  |  |
| Trial 1 - CS180: *nmur-1* | 15.2  0.4 | 17 | 65/80 | + 10 | 0.03 | 0.03 |  |  |  |
| Trial 1 - CS2198: Wild type | 13.6  0.4 | 16 | 69/80 |  |  |  | - 1 | 0.73d | 0.54d |
| Trial 1 - CS2198: *nmur-1* | 15.7  0.4 | 19 | 66/80 | **+ 15** | 0.0003 | 0.0009 | + 3 | 0.14d | 0.35d |
| Trial 1 - CS2429: Wild type | - 1. 0.4 | 16 | 72/80 |  |  |  | 0 | 0.97d | 0.84d |
| Trial 1 - CS2429: *nmur-1* | 16.9  0.5 | 19 | 68/80 | **+ 22** | < 0.0001 | < 0.0001 | **+ 11** | 0.001d | 0.007d |
| Trial 1 - CS1861: Wild type | 13.4  0.5 | 17 | 72/80 |  |  |  | - 3 | 0.99d | 0.61d |
| Trial 1 - CS1861: *nmur-1* | 14.5  0.5 | 17 | 63/80 | + 8 | 0.17 | 0.12 | - 5 | 0.56d | 0.51d |
|  |  |  |  |  |  |  |  |  |  |
| Trial 2 - OP50: Wild type | 11.9  0.8 | 17 | 34/40 |  |  |  |  |  |  |
| Trial 2 - OP50: *nmur-1* | 17.5  0.5 | 19 | 31/40 | **+ 47** | < 0.0001 | < 0.0001 |  |  |  |
| Trial 2 - CS180: Wild type | 14.9  0.4 | 17 | 69/80 |  |  |  |  |  |  |
| Trial 2 - CS180: *nmur-1* | 15.4  0.4 | 17 | 64/80 | + 3 | 0.35 | 0.32 |  |  |  |
| Trial 2 - CS2198: Wild type | 12.8  0.3 | 15 | 72/80 |  |  |  | **- 14** | 0.0004d | < 0.0001d |
| Trial 2 - CS2198: *nmur-1* | 15.9  0.4 | 17 | 68/81 | **+ 24** | < 0.0001 | < 0.0001 | + 3 | 0.20d | 0.41d |
| Trial 2 - CS2429: Wild type | 13.2  0.4 | 17 | 69/80 |  |  |  | **- 11** | 0.05d | 0.001d |
| Trial 2 - CS2429: *nmur-1* | 16.4  0.7 | 21 | 52/80 | **+ 24** | 0.0002 | 0.0001 | + 6 | 0.02d | 0.25d |
|  |  |  |  |  |  |  |  |  |  |
| Trial 3 - CS180: Wild type | 14.3  0.4 | 17 | 65/80 |  |  |  |  |  |  |
| Trial 3 - CS180: *nmur-1* | 14.7  0.4 | 17 | 73/80 | + 3 | 0.88 | 0.0.52 |  |  |  |
| Trial 3 - CS2429: Wild type | 12.8  0.4 | 14 | 72/80 |  |  |  | **- 10** | 0.03d | 0.007d |
| Trial 3 - CS2429: *nmur-1* | 15.4  0.5 | 18 | 68/80 | **+ 20** | 0.0001 | < 0.0001 | + 5 | 0.05d | 0.17d |
|  |  |  |  |  |  |  |  |  |  |
|  |  |  |  |  |  |  |  |  |  |
|  |  |  |  |  |  |  |  |  |  |
